# Supplementary material for: Investigation Of The Effects Of Machining Parameters On Tool Life And Surface Roughness During The Face Milling Of The NiTi Shape Memory Alloy With Uncoated Tools
Source: Preprints.org preprint supplement (doi:10.20944/preprints202008.0383.v1), 2020-08-18
Supplement: Supplementary file 1 [file supplementary]

August 5, 2020

To whom it may concern:

I hereby confirm that the article described below was edited and proofread by me, who is a near native, experienced English language instructor and who has worked as both a tutor and the coordinator of the Academic Writing Center at Middle East Technical University, Turkey for 18 years now.

Title: **INVESTIGATION OF THE EFFECTS OF MACHINING PARAMETERS ON TOOL LIFE AND SURFACE ROUGHNESS DURING THE FACE MILLING OF THE NITI SHAPE MEMORY ALLOY WITH UNCOATED TOOLS**

Authors: **Emre Altas, Hasan Gokkaya, Dervis Ozkan**

If you require any further information about the editing and proofreading service I provided, please do not hesitate to contact me.

Yours faithfully,

Deniz Saydam (PhD)

Instructor

School of Foreign Languages, Department of Basic English

Middle East Technical University

Tel: +90 530 441 3559

Email: dkucuk@metu.edu.tr
